# Supplementary material for: Tumor Necrosis Factor Alpha Induces Reactivation of Human Cytomegalovirus Independently of Myeloid Cell Differentiation following Posttranscriptional Establishment of Latency
Source: PubMed Central journal article supplement (PMC6134100; doi:10.1128/mbio.01560-18), 2018-09-11
Supplement: mbo004184056sf1.pdf [file mbo004184056sf1.pdf]

A

UL123 DNA

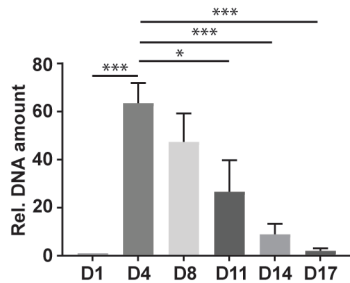

UL54 DNA

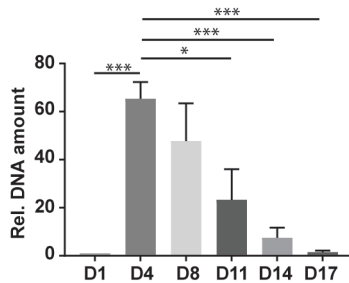

UL32 DNA

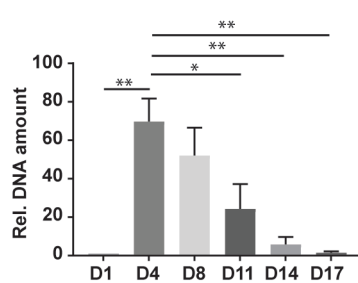

B

UL123 RNA

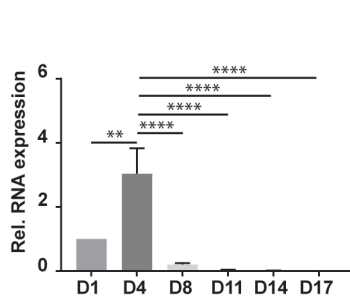

UL54 RNA

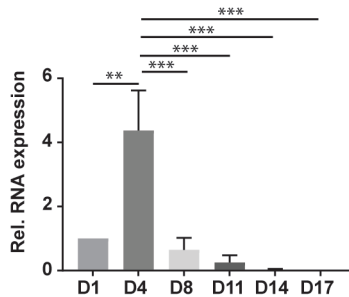

UL32 RNA

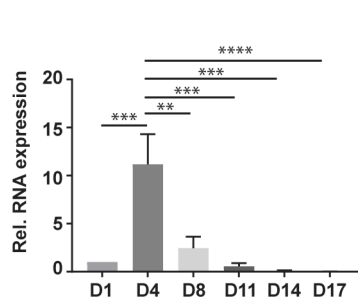

Fig. S1

FIG. 9.



1
