# Supplementary material for: Tumor Necrosis Factor Alpha Induces Reactivation of Human Cytomegalovirus Independently of Myeloid Cell Differentiation following Posttranscriptional Establishment of Latency
Source: PubMed Central journal article supplement (PMC6134100; doi:10.1128/mbio.01560-18), 2018-09-11
Supplement: mbo004184056sf3.pdf [file mbo004184056sf3.pdf]

**A**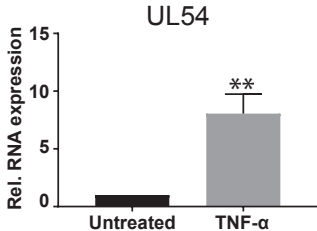**B**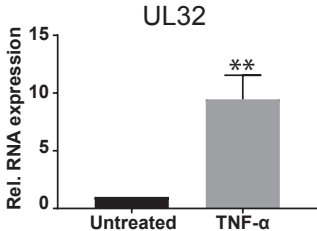**Fig. S3**
