# Supplementary material for: Tumor Necrosis Factor Alpha Induces Reactivation of Human Cytomegalovirus Independently of Myeloid Cell Differentiation following Posttranscriptional Establishment of Latency
Source: PubMed Central journal article supplement (PMC6134100; doi:10.1128/mbio.01560-18), 2018-09-11
Supplement: mbo004184056sf5.pdf [file mbo004184056sf5.pdf]

**UL122 vs RNaseP**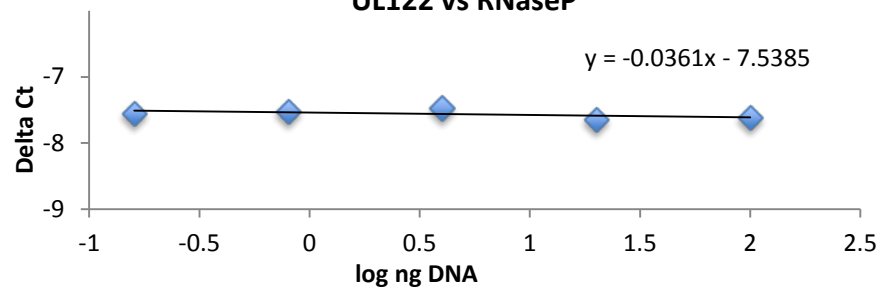**UL123 vs RNaseP**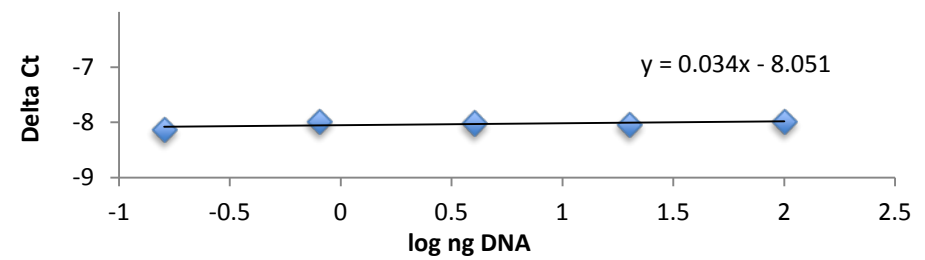**UL54 vs RNaseP**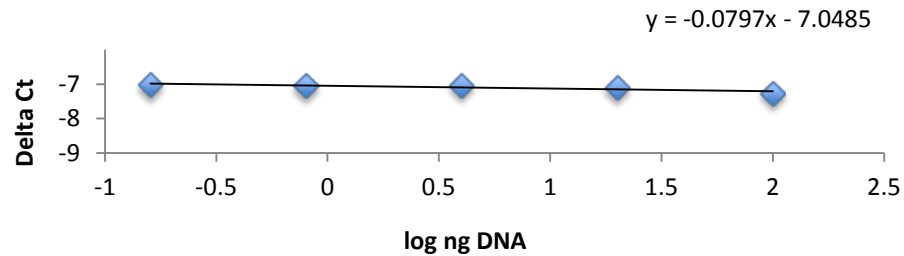**UL32 vs RNaseP**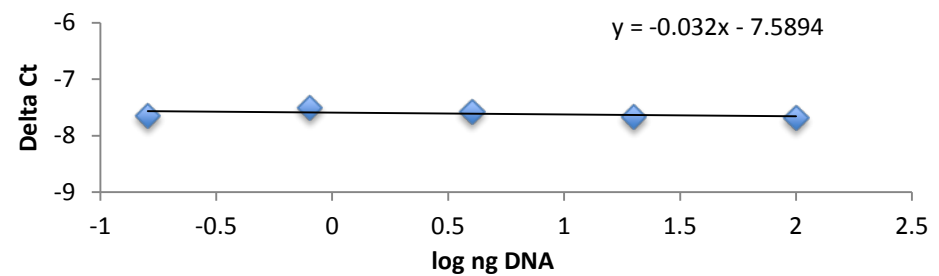**US28 vs RNaseP**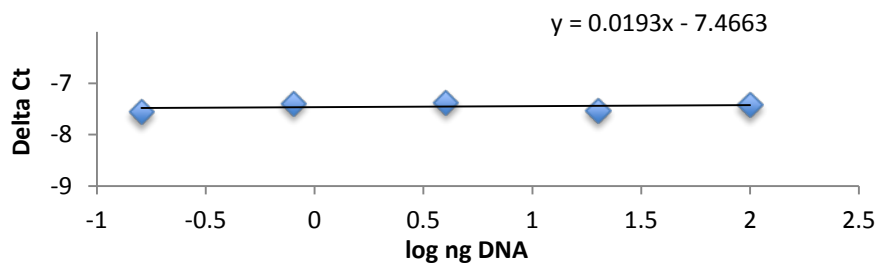**UL138 vs RNaseP**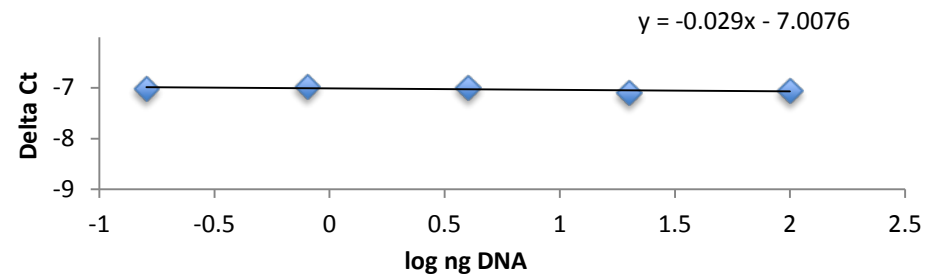**RNA 2.7**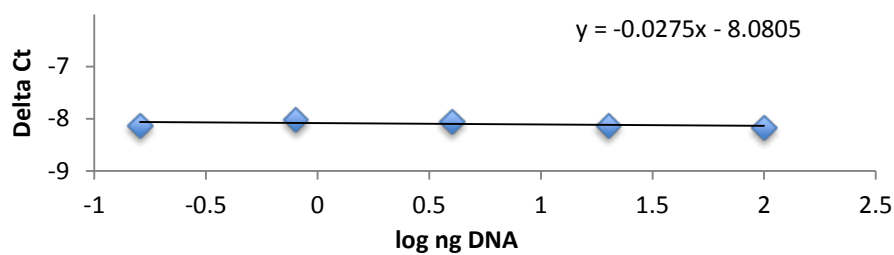**Fig. S5**
