# Supplementary material for: Tumor Necrosis Factor Alpha Induces Reactivation of Human Cytomegalovirus Independently of Myeloid Cell Differentiation following Posttranscriptional Establishment of Latency
Source: PubMed Central journal article supplement (PMC6134100; doi:10.1128/mbio.01560-18), 2018-09-11
Supplement: mbo004184056sf6.pdf [file mbo004184056sf6.pdf]

**UL122 vs GAPDH**

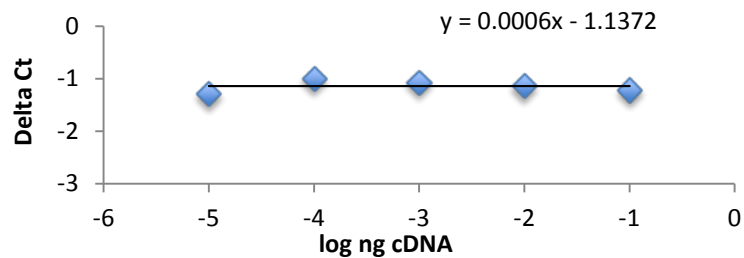

**UL123 vs GAPDH**

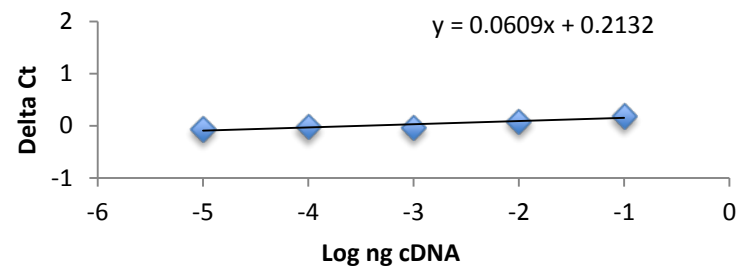

**UL32 vs GAPDH**

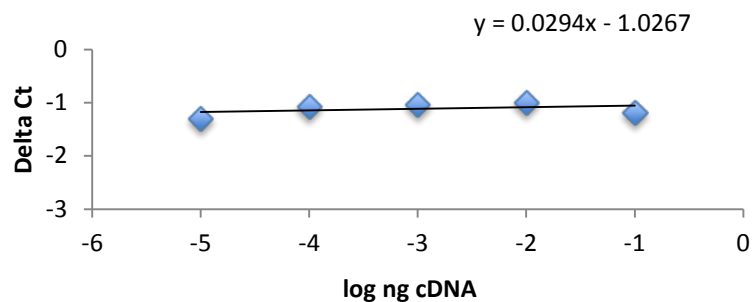

**UL54 vs GAPDH**

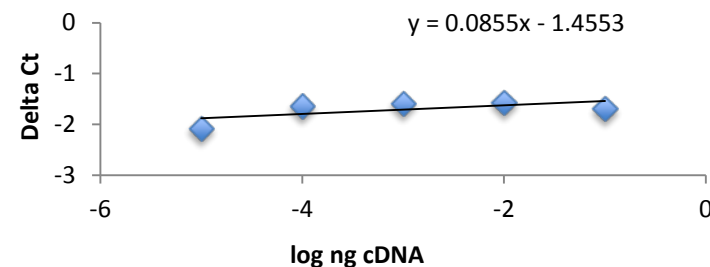

**RNA 2.7 vs GAPDH**

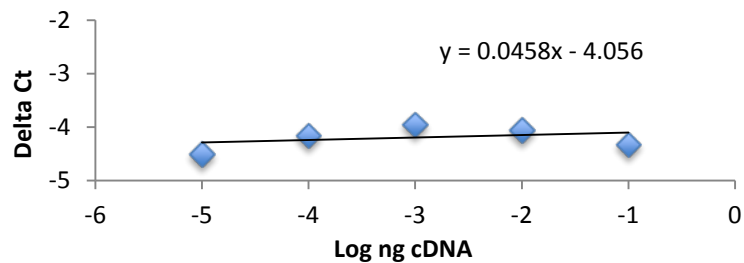

**UL138 vs GAPDH**

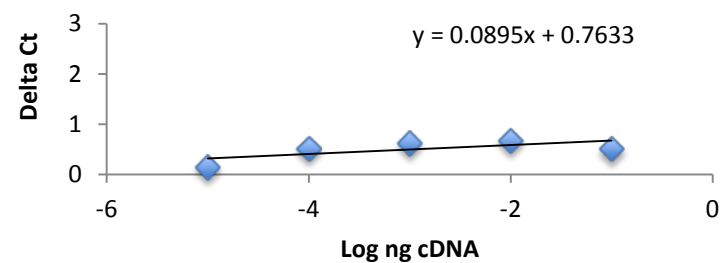

**US28 vs GAPDH**

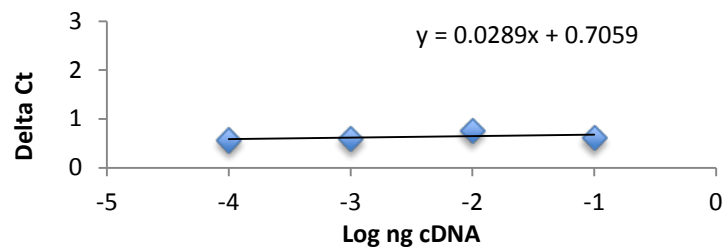

**Fig. S6**
