# Supplementary material for: Tumor Necrosis Factor Alpha Induces Reactivation of Human Cytomegalovirus Independently of Myeloid Cell Differentiation following Posttranscriptional Establishment of Latency
Source: PubMed Central journal article supplement (PMC6134100; doi:10.1128/mbio.01560-18), 2018-09-11
Supplement: mbo004184056sf7.pdf [file mbo004184056sf7.pdf]

### GAPDH in K3 infection time course

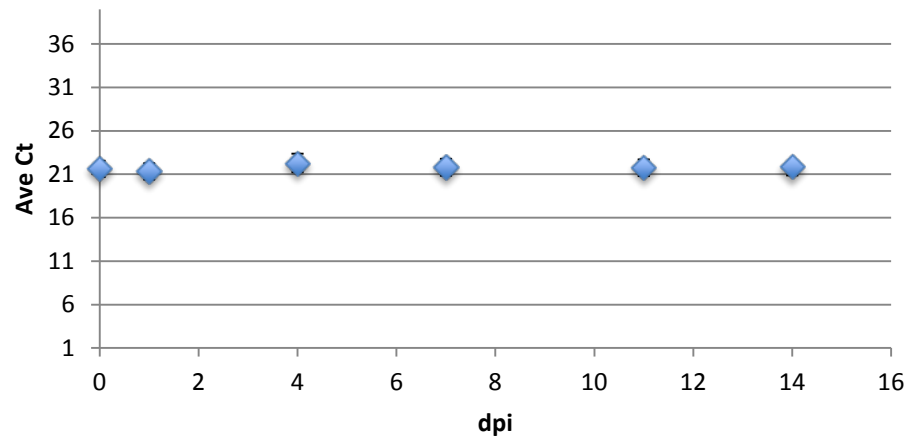

Fig. S7
